# Supplementary material for: Predicting the Effect of Mutations on Protein-Protein Binding Interactions through Structure-Based Interface Profiles
Source: PubMed Central journal article supplement (PMC4624718; doi:10.1371/journal.pcbi.1004494), 2015-10-27
Supplement: pcbi.1004494.s001.pdf [file pcbi.1004494.s001.pdf]

# Predicting the Effect of Mutations on Protein-Protein Binding Interactions through Structure-Based Interface Profiles

Jeffrey R. Brender, Yang Zhang

## Supporting Information

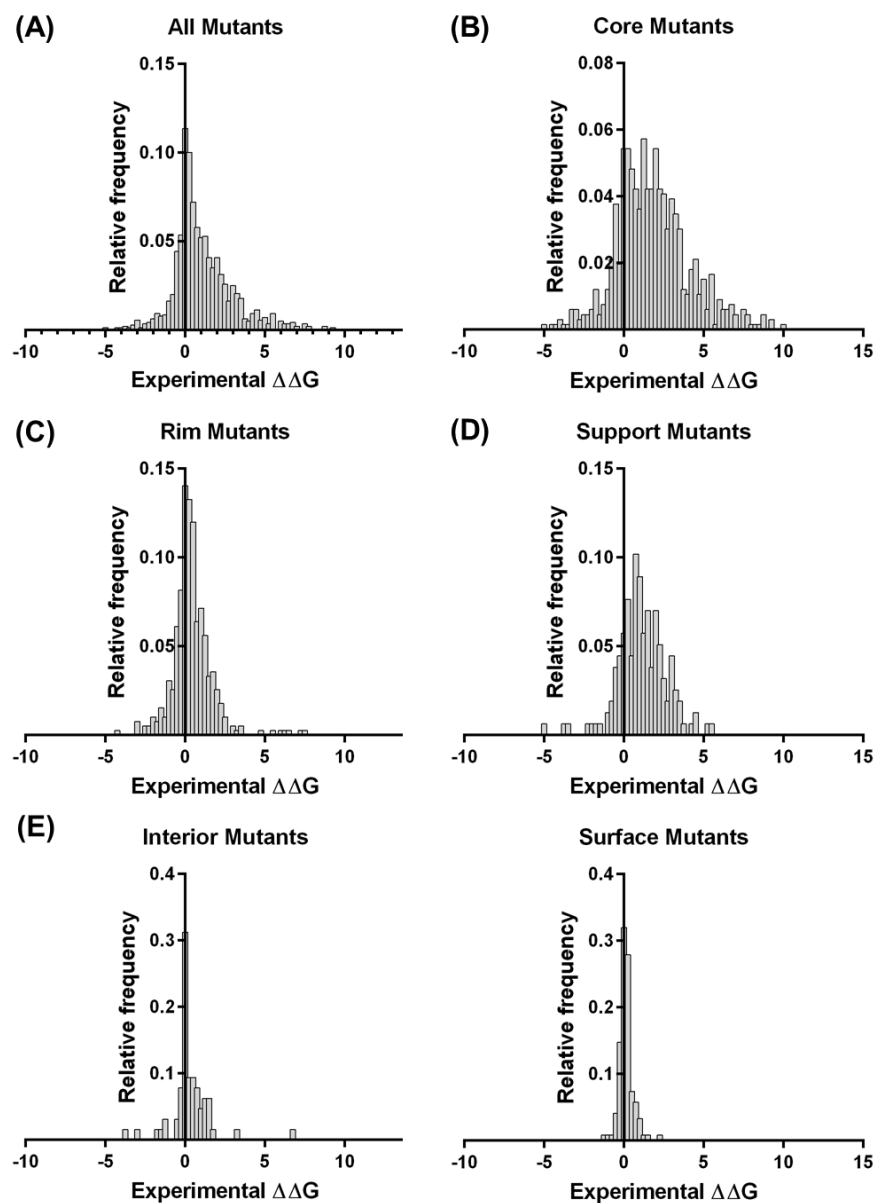

**Figure S1.** Relative frequency of  $\Delta\Delta G$  values for different type of interface residues according to the classification in Figure 6.
